# Supplementary material
Source: publisher site journal article supplement (https://www.dovepress.com/article/461728)
Supplement: Supplementary file 1 [file get_supplementary_file.php]

**Supporting Information**


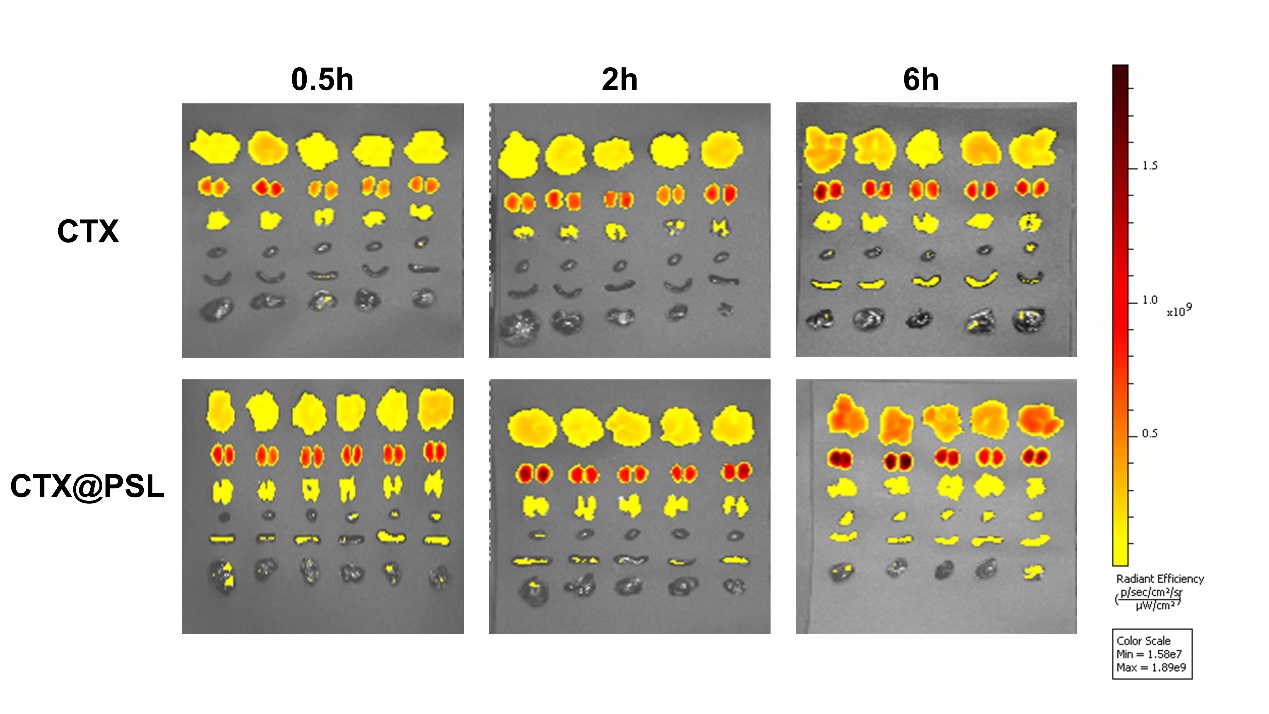


**Figure S1.** Fluorescence imaging analysis of tissue distribution from melanoma xenograft-bearing mice after intravenous administration of CTX and CTX@PSL at different time, Data are Mean ± SD (n=5).

**Table S1.** Storage stability evaluation of CTX@PSL, Data are Mean ± SD (n=3)

| **Time（day）** | **n** | **1** | **7** | **15** |
| --- | --- | --- | --- | --- |
| **zeta potential** | 3 | -18.9 ± 0.00 | -20.03 ± 0.46 | -23.17 ± 0.23 |
